# Supplementary material for: Inverse Association between High-Density Lipoprotein Cholesterol and Adverse Outcomes among Acute Ischemic Stroke Patients with Diabetes Mellitus
Source: MDPI journal article supplement (doi:10.3390/biomedicines9121947), 2021-12-20
Supplement: s1 [file s1]

## Supplementary Materials

### **Inverse Association Between High-Density Lipoprotein Cholesterol and Adverse Outcomes Among Acute Ischemic Stroke Patients with Diabetes Mellitus**

Guoliang Hu <sup>1,2,3,4</sup>, Yuesong Pan <sup>2</sup>, Mengxing Wang <sup>2</sup>, Xia Meng <sup>2</sup>, Yong Jiang <sup>2</sup>, Zixiao Li <sup>1,2,5</sup>, Hao Li <sup>2</sup>, Yongjun Wang <sup>1,2,3,4,\*</sup> and Yilong Wang <sup>1,2,3,4,5,\*</sup>

<sup>1</sup> Department of Neurology, Beijing Tiantan Hospital, Capital Medical University, Beijing, China; guoliang\_hu@163.com (G.L.H.); lizixiao2008@hotmail.com (Z.X.L.)

<sup>2</sup> China National Clinical Research Center for Neurological Diseases, Beijing, China; yuesongpan@ncrcnd.org.cn (Y.S.P.); wmxing1227@163.com (M.X.W.); mengxia45@163.com (X.M.); jiangyong@ncrcnd.org.cn (Y.J.); li\_hao71@aliyun.com (H.L.)

<sup>3</sup> Advanced Innovation Center for Human Brain Protection, Capital Medical University, Beijing, China

<sup>4</sup> Beijing Key Laboratory of Translational Medicine for Cerebrovascular Disease, Beijing, China

<sup>5</sup> Chinese Institute for Brain Research, Beijing, China

\* Correspondence: yongjunwang@ncrcnd.org.cn (Y.J.W.); yilong528@aliyun.com (Y.L.W.)

## Supplementary Tables

Supplementary Table S1 Characteristics of Patients Included According to HDL-C Quintiles

| Characteristics                       | Overall       | HDL-C quintiles     |                         |                         |                         |                     | P value |
|---------------------------------------|---------------|---------------------|-------------------------|-------------------------|-------------------------|---------------------|---------|
|                                       |               | Q1, <0.71<br>mmol/L | Q2, 0.71-0.83<br>mmol/L | Q3, 0.83-0.95<br>mmol/L | Q4, 0.95-1.11<br>mmol/L | Q5, ≥1.11<br>mmol/L |         |
| <b>Patients, n</b>                    | 3,824         | 757                 | 712                     | 792                     | 780                     | 783                 |         |
| <b>SBP, mean (SD)</b>                 | 152.53±22.18  | 151.65±21.87        | 150.05±22.10            | 153.00±20.92            | 152.72±22.32            | 154.99±23.39        | <0.001  |
| <b>DBP, mean (SD)</b>                 | 87.59±13.00   | 87.52±12.65         | 87.41±12.88             | 87.68±13.06             | 87.47±12.72             | 87.84±13.66         | 0.969   |
| <b>Medical history, n (%)</b>         |               |                     |                         |                         |                         |                     |         |
| <b>History of dyslipidemia</b>        | 409 (10.70)   | 92 (12.15)          | 78 (10.96)              | 80 (10.10)              | 85 (10.90)              | 74 (9.45)           | 0.504   |
| <b>Heart failure</b>                  | 27 (0.71)     | 10 (1.32)           | 3 (0.42)                | 4 (0.51)                | 3 (0.38)                | 7 (0.89)            | 0.141   |
| <b>Medication history, n (%)</b>      |               |                     |                         |                         |                         |                     |         |
| <b>Antihypertensive agents</b>        | 1,944 (50.84) | 394 (52.05)         | 335 (47.05)             | 418 (52.78)             | 383 (49.10)             | 414 (52.87)         | 0.093   |
| <b>NIHSS on admission, n (%)</b>      |               |                     |                         |                         |                         |                     | 0.634   |
| <b>0-5</b>                            | 2,677 (70.01) | 529 (69.88)         | 504 (70.79)             | 563 (71.09)             | 543 (69.62)             | 538 (68.71)         |         |
| <b>6-15</b>                           | 1,064 (27.82) | 205 (27.08)         | 195 (27.39)             | 217 (27.40)             | 218 (27.95)             | 229 (29.25)         |         |
| <b>≥16</b>                            | 83 (2.17)     | 23 (3.04)           | 13 (1.83)               | 12 (1.52)               | 19 (2.44)               | 16 (2.04)           |         |
| <b>Medication at discharge, n (%)</b> |               |                     |                         |                         |                         |                     |         |
| <b>Antihypertensive agents</b>        | 2,083 (54.63) | 414 (54.98)         | 370 (52.11)             | 433 (54.67)             | 423 (54.37)             | 443 (56.79)         | 0.501   |

DBP, diastolic blood pressure; HDL-C, high-density lipoprotein cholesterol; IQR, interquartile range; NIHSS, National Institutes of Health Stroke Scale; SBP, systolic blood pressure.

**Supplementary Table S2 Hazard Ratios (95% CIs) for Risk of Adverse Outcomes According to Quintiles of HDL-C in Patients Included in This Study**

| Outcome                          | HDL-C quintiles, mmol/L |                      |                      |                      |                  | P for trend | Each 1-mmol/L increase in HDL-C |
|----------------------------------|-------------------------|----------------------|----------------------|----------------------|------------------|-------------|---------------------------------|
|                                  | Q1, <0.71 mmol/L        | Q2, 0.71-0.83 mmol/L | Q3, 0.83-0.95 mmol/L | Q4, 0.95-1.11 mmol/L | Q5, ≥1.11 mmol/L |             |                                 |
| 6 months                         |                         |                      |                      |                      |                  |             |                                 |
| Recurrent stroke                 |                         |                      |                      |                      |                  |             |                                 |
| Recurrent ischemic stroke        |                         |                      |                      |                      |                  |             |                                 |
| Events, n (%)                    | 75 (9.91)               | 66 (9.27)            | 64 (8.08)            | 61 (7.82)            | 60 (7.66)        |             |                                 |
| Incidence, per 1000 person-years | 220.64                  | 206.13               | 178.22               | 171.55               | 167.77           |             |                                 |
| Adjusted HR*                     | 1.44 (1.02-2.03)        | 1.36 (0.95-1.94)     | 1.14 (0.80-1.63)     | 1.09 (0.76-1.56)     | 1.00             | 0.020       | 0.66 (0.44-0.98)                |
| Adjusted HR†                     | 1.54 (1.05-2.28)        | 1.46 (0.99-2.15)     | 1.20 (0.82-1.76)     | 1.06 (0.72-1.57)     | 1.00             | 0.010       | 0.56 (0.36-0.89)                |
| Recurrent hemorrhagic stroke     |                         |                      |                      |                      |                  |             |                                 |
| Events, n (%)                    | 5 (0.66)                | 7 (0.98)             | 4 (0.51)             | 4 (0.51)             | 4 (0.51)         |             |                                 |
| Incidence, per 1000 person-years | 13.76                   | 20.37                | 10.50                | 10.64                | 10.64            |             |                                 |
| Adjusted HR*                     | 1.17 (0.31-4.45)        | 1.76 (0.51-6.14)     | 0.92 (0.23-3.72)     | 0.95 (0.24-3.81)     | 1.00             | 0.557       | 1.20 (0.29-4.86)                |
| Adjusted HR†                     | 1.71 (0.33-8.74)        | 1.71 (0.33-8.92)     | 1.57 (0.32-7.64)     | 1.75 (0.35-8.66)     | 1.00             | 0.491       | 1.06 (0.24-4.71)                |
| MACEs                            |                         |                      |                      |                      |                  |             |                                 |
| Cardiovascular death             |                         |                      |                      |                      |                  |             |                                 |
| Events, n (%)                    | 6 (0.79)                | 6 (0.84)             | 9 (1.14)             | 7 (0.90)             | 13 (1.66)        |             |                                 |
| Incidence, per 1000 person-years | 16.43                   | 17.41                | 23.59                | 18.58                | 34.48            |             |                                 |
| Adjusted HR*                     | 0.52 (0.20-1.39)        | 0.57 (0.21-1.52)     | 0.74 (0.31-1.75)     | 0.58 (0.23-1.45)     | 1.00             | 0.179       | 2.19 (0.92-5.18)                |
| Adjusted HR†                     | 0.45 (0.11-1.87)        | 0.53 (0.13-2.20)     | 1.25 (0.44-3.53)     | 0.75 (0.24-2.39)     | 1.00             | 0.346       | 1.92 (0.57-6.45)                |
| Non-fatal stroke                 |                         |                      |                      |                      |                  |             |                                 |
| Events, n (%)                    | 40 (5.28)               | 30 (4.21)            | 22 (2.78)            | 25 (3.21)            | 28 (3.58)        |             |                                 |
| Incidence, per 1000 person-years | 112.57                  | 88.84                | 58.49                | 67.49                | 75.67            |             |                                 |
| Adjusted HR*                     | 1.58 (0.97-2.59)        | 1.25 (0.74-2.11)     | 0.81 (0.46-1.42)     | 0.93 (0.54-1.59)     | 1.00             | 0.045       | 0.73 (0.40-1.33)                |

| Outcome                             | HDL-C quintiles, mmol/L |                      |                      |                      |                  | P for trend | Each 1-mmol/L increase in HDL-C |
|-------------------------------------|-------------------------|----------------------|----------------------|----------------------|------------------|-------------|---------------------------------|
|                                     | Q1, <0.71 mmol/L        | Q2, 0.71-0.83 mmol/L | Q3, 0.83-0.95 mmol/L | Q4, 0.95-1.11 mmol/L | Q5, ≥1.11 mmol/L |             |                                 |
| Adjusted HR†                        | 1.60 (0.94-2.72)        | 1.27 (0.73-2.2)      | 0.80 (0.45-1.44)     | 0.90 (0.51-1.57)     | 1.00             | 0.055       | 0.72 (0.38-1.38)                |
| <b>Non-fatal MI</b>                 |                         |                      |                      |                      |                  |             |                                 |
| Events, n (%)                       | 3 (0.40)                | 1 (0.14)             | 4 (0.51)             | 1 (0.13)             | 0 (0.00)         |             |                                 |
| Incidence, per 1000 person-years    | 8.22                    | 2.90                 | 10.50                | 2.66                 | 0                |             |                                 |
| Adjusted HR*                        | -                       | -                    | -                    | -                    | -                | -           | 0.06 (0.01-0.89)                |
| Adjusted HR†                        | -                       | -                    | -                    | -                    | -                | -           | 0.07 (0.004-1.10)               |
| <b>12 months</b>                    |                         |                      |                      |                      |                  |             |                                 |
| <b>Recurrent stroke</b>             |                         |                      |                      |                      |                  |             |                                 |
| <b>Recurrent ischemic stroke</b>    |                         |                      |                      |                      |                  |             |                                 |
| Events, n (%)                       | 86 (11.36)              | 82 (11.52)           | 83 (10.48)           | 71 (9.10)            | 69 (8.81)        |             |                                 |
| Incidence, per 1000 person-years    | 129.26                  | 131.16               | 117.71               | 101.68               | 98.40            |             |                                 |
| Adjusted HR*                        | 1.44 (1.04-1.99)        | 1.47 (1.06-2.04)     | 1.29 (0.94-1.78)     | 1.10 (0.79-1.54)     | 1.00             | 0.007       | 0.66 (0.45-0.95)                |
| Adjusted HR†                        | 1.61 (1.12-2.31)        | 1.60 (1.12-2.29)     | 1.41 (1.00-2.00)     | 1.11 (0.77-1.59)     | 1.00             | 0.002       | 0.54 (0.35-0.81)                |
| <b>Recurrent hemorrhagic stroke</b> |                         |                      |                      |                      |                  |             |                                 |
| Events, n (%)                       | 8 (1.06)                | 9 (1.26)             | 5 (0.63)             | 6 (0.77)             | 7 (0.89)         |             |                                 |
| Incidence, per 1000 person-years    | 11.10                   | 13.26                | 6.61                 | 8.05                 | 9.40             |             |                                 |
| Adjusted HR*                        | 1.01 (0.36-2.83)        | 1.22 (0.45-3.33)     | 0.63 (0.20-1.99)     | 0.78 (0.26-2.33)     | 1.00             | 0.763       | 1.47 (0.48-4.47)                |
| Adjusted HR†                        | 1.30 (0.40-4.21)        | 1.15 (0.35-3.82)     | 0.95 (0.28-3.25)     | 1.12 (0.34-3.64)     | 1.00             | 0.627       | 1.32 (0.40-4.34)                |
| <b>MACEs</b>                        |                         |                      |                      |                      |                  |             |                                 |
| <b>Cardiovascular death</b>         |                         |                      |                      |                      |                  |             |                                 |
| Events, n (%)                       | 8 (1.06)                | 7 (0.98)             | 13 (1.64)            | 8 (1.03)             | 19 (2.43)        |             |                                 |
| Incidence, per 1000 person-years    | 11.02                   | 10.26                | 17.15                | 10.70                | 25.42            |             |                                 |

| Outcome                          | HDL-C quintiles, mmol/L |                      |                      |                      |                  | P for trend | Each 1-mmol/L increase in HDL-C |
|----------------------------------|-------------------------|----------------------|----------------------|----------------------|------------------|-------------|---------------------------------|
|                                  | Q1, <0.71 mmol/L        | Q2, 0.71-0.83 mmol/L | Q3, 0.83-0.95 mmol/L | Q4, 0.95-1.11 mmol/L | Q5, ≥1.11 mmol/L |             |                                 |
| Adjusted HR*                     | 0.43 (0.19-1.00)        | 0.41 (0.17-0.99)     | 0.68 (0.33-1.38)     | 0.42 (0.18-0.97)     | 1.00             | 0.034       | 2.50 (1.22-5.12)                |
| Adjusted HR†                     | 0.40 (0.14-1.18)        | 0.33 (0.10-1.06)     | 0.89 (0.40-2.02)     | 0.43 (0.16-1.15)     | 1.00             | 0.086       | 2.30 (0.88-5.98)                |
| <b>Non-fatal stroke</b>          |                         |                      |                      |                      |                  |             |                                 |
| Events, n (%)                    | 53 (7.00)               | 49 (6.88)            | 41 (5.18)            | 37 (4.74)            | 37 (4.73)        |             |                                 |
| Incidence, per 1000 person-years | 76.25                   | 74.57                | 55.56                | 50.92                | 51.07            |             |                                 |
| Adjusted HR*                     | 1.59 (1.04-2.44)        | 1.56 (1.01-2.41)     | 1.15 (0.73-1.79)     | 1.04 (0.66-1.64)     | 1.00             | 0.009       | 0.69 (0.42-1.14)                |
| Adjusted HR†                     | 1.74 (1.10-2.76)        | 1.64 (1.04-2.60)     | 1.22 (0.77-1.95)     | 1.01 (0.63-1.64)     | 1.00             | 0.004       | 0.60 (0.35-1.04)                |
| <b>Non-fatal MI</b>              |                         |                      |                      |                      |                  |             |                                 |
| Events, n (%)                    | 3 (0.40)                | 2 (0.28)             | 5 (0.63)             | 2 (0.26)             | 0 (0.00)         |             |                                 |
| Incidence, per 1000 person-years | 4.14                    | 2.93                 | 6.62                 | 2.68                 | 0                |             |                                 |
| Adjusted HR*                     | -                       | -                    | -                    | -                    | -                | -           | 0.13 (0.01-1.32)                |
| Adjusted HR†                     | -                       | -                    | -                    | -                    | -                | -           | 0.14 (0.01-1.69)                |

HDL-C, high-density lipoprotein cholesterol; HR, hazard ratio; MACEs, major adverse cardiovascular events; MI, myocardial infarction.

\* model 1: age, sex

† model 2: age, sex, body mass index, smoking, drinking, hypertension, history of dyslipidemia, history of stroke, history of atrial fibrillation, history of coronary heart disease, medication history of antiplatelet agents, medication history of lipid-lowering drugs, low-density lipoprotein cholesterol, triglycerides, National Institutes of Health Stroke Scale on admission, TOAST, use of antiplatelet agents at discharge, use of anticoagulant agents at discharge, and use of statins at discharge.

**Supplementary Table S3 Sensitivity Analysis for the Association between HDL-C and Adverse Outcomes**

| Outcomes                         | HDL-C quintiles, mmol/L |                      |                      |                      |                  | P for trend | Each 1-mmol/L increase in HDL-C |
|----------------------------------|-------------------------|----------------------|----------------------|----------------------|------------------|-------------|---------------------------------|
|                                  | Q1, <0.71 mmol/L        | Q2, 0.71-0.83 mmol/L | Q3, 0.83-0.95 mmol/L | Q4, 0.95-1.11 mmol/L | Q5, ≥1.11 mmol/L |             |                                 |
| 6 months                         |                         |                      |                      |                      |                  |             |                                 |
| Recurrent stroke                 |                         |                      |                      |                      |                  |             |                                 |
| Events, n (%)                    | 75 (10.33)              | 64 (9.41)            | 62 (8.39)            | 59 (8.17)            | 56 (7.87)        |             |                                 |
| Incidence, per 1000 person-years | 230.90                  | 208.84               | 185.23               | 178.28               | 171.77           |             |                                 |
| Adjusted HR*                     | 1.44 (1.01-2.05)        | 1.32 (0.92-1.90)     | 1.14 (0.79-1.64)     | 1.10 (0.76-1.58)     | 1.00             | 0.025       | 0.72 (0.47-1.08)                |
| Adjusted HR†                     | 1.50 (1.02-2.21)        | 1.33 (0.89-1.98)     | 1.16 (0.78-1.71)     | 1.03 (0.69-1.53)     | 1.00             | 0.022       | 0.66 (0.42-1.05)                |
| MACEs                            |                         |                      |                      |                      |                  |             |                                 |
| Events, n (%)                    | 78 (10.74)              | 67 (9.85)            | 68 (9.20)            | 62 (8.59)            | 58 (8.15)        |             |                                 |
| Incidence, per 1000 person-years | 240.19                  | 218.63               | 203.46               | 187.44               | 177.91           |             |                                 |
| Adjusted HR*                     | 1.45 (1.03-2.05)        | 1.34 (0.94-1.91)     | 1.21 (0.85-1.72)     | 1.11 (0.78-1.60)     | 1.00             | 0.020       | 0.69 (0.46-1.04)                |
| Adjusted HR†                     | 1.52 (1.04-2.22)        | 1.36 (0.92-2.00)     | 1.24 (0.85-1.81)     | 1.03 (0.70-1.51)     | 1.00             | 0.014       | 0.63 (0.40-0.99)                |
| 12 months                        |                         |                      |                      |                      |                  |             |                                 |
| Recurrent stroke                 |                         |                      |                      |                      |                  |             |                                 |
| Events, n (%)                    | 89 (12.26)              | 80 (11.76)           | 81 (10.96)           | 69 (9.56)            | 68 (9.55)        |             |                                 |
| Incidence, per 1000 person-years | 140.29                  | 133.89               | 123.47               | 105.93               | 106.31           |             |                                 |
| Adjusted HR*                     | 1.42 (1.03-1.95)        | 1.37 (0.98-1.90)     | 1.23 (0.89-1.70)     | 1.05 (0.75-1.48)     | 1.00             | 0.012       | 0.73 (0.50-1.07)                |
| Adjusted HR†                     | 1.53 (1.07-2.17)        | 1.40 (0.98-2.00)     | 1.29 (0.92-1.83)     | 1.02 (0.71-1.47)     | 1.00             | 0.006       | 0.65 (0.43-0.98)                |
| MACEs                            |                         |                      |                      |                      |                  |             |                                 |

| Outcomes                         | HDL-C quintiles, mmol/L |                         |                         |                         |                     | P for trend | Each 1-mmol/L increase in HDL-C |
|----------------------------------|-------------------------|-------------------------|-------------------------|-------------------------|---------------------|-------------|---------------------------------|
|                                  | Q1,<br><0.71 mmol/L     | Q2,<br>0.71-0.83 mmol/L | Q3,<br>0.83-0.95 mmol/L | Q4,<br>0.95-1.11 mmol/L | Q5,<br>≥1.11 mmol/L |             |                                 |
| Events, n (%)                    | 92 (12.67)              | 84 (12.35)              | 88 (11.91)              | 73 (10.11)              | 72 (10.11)          |             |                                 |
| Incidence, per 1000 person-years | 145.27                  | 140.63                  | 134.75                  | 112.25                  | 112.57              |             |                                 |
| Adjusted HR*                     | 1.37 (1.00-1.88)        | 1.34 (0.98-1.85)        | 1.26 (0.92-1.72)        | 1.05 (0.76-1.46)        | 1.00                | 0.017       | 0.73 (0.51-1.06)                |
| Adjusted HR†                     | 1.46 (1.03-2.06)        | 1.36 (0.96-1.93)        | 1.32 (0.94-1.84)        | 1.00 (0.70-1.42)        | 1.00                | 0.009       | 0.65 (0.44-0.98)                |

HDL-C, high-density lipoprotein cholesterol; MACEs, major adverse cardiovascular events.

\* model 1: age, sex

† model 2: age, sex, body mass index, smoking, drinking, hypertension, history of dyslipidemia, history of stroke, history of atrial fibrillation, history of coronary heart disease, medication history of antiplatelet agents, medication history of lipid-lowering drugs, low-density lipoprotein cholesterol, triglycerides, National Institutes of Health Stroke Scale on admission, TOAST, use of antiplatelet agents at discharge, use of anticoagulant agents at discharge, and use of statins at discharge.

**Supplementary Table S4 Multivariable Analysis of Association between Low Levels of HDL-C and Adverse Outcomes within 1 year Compared with Normal Levels of HDL-C**

|                  | Events, n (%) | Model 1*:<br>HR (95% CI) | P value | Model 2†:<br>HR (95% CI) | P value |
|------------------|---------------|--------------------------|---------|--------------------------|---------|
| 6 months         |               |                          |         |                          |         |
| Recurrent stroke | 243 (9.52)    | 1.29 (1.02-1.63)         | 0.038   | 1.40 (1.07-1.82)         | 0.014   |
| MACEs            | 259 (10.15)   | 1.33 (1.06-1.68)         | 0.016   | 1.45 (1.12-1.88)         | 0.005   |
| 12 months        |               |                          |         |                          |         |
| Recurrent stroke | 299 (11.72)   | 1.34 (1.08-1.67)         | 0.008   | 1.47 (1.16-1.87)         | 0.002   |
| MACEs            | 318 (12.46)   | 1.35 (1.09-1.67)         | 0.005   | 1.47 (1.17-1.86)         | 0.001   |

HDL-C, high-density lipoprotein cholesterol; MACEs, major adverse cardiovascular events.

\* model 1: age, sex

† model 2: age, sex, body mass index, smoking, drinking, hypertension, history of dyslipidemia, history of stroke, history of atrial fibrillation, history of coronary heart disease, medication history of antiplatelet agents, medication history of lipid-lowering drugs, low-density lipoprotein cholesterol, triglycerides, National Institutes of Health Stroke Scale on admission, TOAST, use of antiplatelet agents at discharge, use of anticoagulant agents at discharge, and use of statins at discharge.



Supplementary Table S5.1 Subgroup Analysis for the Association between HDL-C and Recurrent Stroke at 6 Months

| Subgroup                     | Events (%)  | HDL-C quintiles, mmol/L |                      |                      |                      |                  | P for trend | P for interaction |
|------------------------------|-------------|-------------------------|----------------------|----------------------|----------------------|------------------|-------------|-------------------|
|                              |             | Q1, <0.71 mmol/L        | Q2, 0.71-0.83 mmol/L | Q3, 0.83-0.95 mmol/L | Q4, 0.95-1.11 mmol/L | Q5, ≥1.11 mmol/L |             |                   |
| Age                          |             |                         |                      |                      |                      |                  |             |                   |
| <65 years                    | 171 (7.91)  | 1.43 (0.81-2.53)        | 1.40 (0.81-2.43)     | 1.20 (0.69-2.08)     | 1.06 (0.60-1.86)     | 1.00             | 0.131       | 0.960             |
| ≥65 years                    | 173 (10.41) | 1.80 (1.08-3.01)        | 1.63 (0.95-2.78)     | 1.18 (0.70-2.01)     | 1.12 (0.66-1.89)     | 1.00             | 0.015       |                   |
| Sex                          |             |                         |                      |                      |                      |                  |             |                   |
| Men                          | 217 (8.62)  | 1.56 (0.94-2.59)        | 1.54 (0.93-2.55)     | 1.09 (0.64-1.85)     | 1.03 (0.60-1.77)     | 1.00             | 0.027       | 0.921             |
| Women                        | 127 (9.72)  | 1.52 (0.83-2.78)        | 1.33 (0.71-2.50)     | 1.43 (0.82-2.48)     | 1.15 (0.66-1.99)     | 1.00             | 0.133       |                   |
| Smoking                      |             |                         |                      |                      |                      |                  |             |                   |
| No                           | 250 (9.32)  | 1.62 (1.05-2.50)        | 1.61 (1.04-2.47)     | 1.15 (0.74-1.77)     | 1.07 (0.69-1.65)     | 1.00             | 0.011       | 0.717             |
| Yes                          | 94 (8.22)   | 1.59 (0.71-3.53)        | 1.29 (0.57-2.90)     | 1.42 (0.65-3.10)     | 1.21 (0.54-2.72)     | 1.00             | 0.265       |                   |
| Drinking                     |             |                         |                      |                      |                      |                  |             |                   |
| No                           | 287 (8.68)  | 1.44 (0.95-2.18)        | 1.43 (0.95-2.15)     | 1.10 (0.73-1.67)     | 1.08 (0.72-1.62)     | 1.00             | 0.044       | 0.923             |
| Yes                          | 57 (11.03)  | 2.68 (0.93-7.72)        | 2.27 (0.76-6.77)     | 2.15 (0.75-6.20)     | 1.24 (0.38-4.02)     | 1.00             | 0.036       |                   |
| Hypertension                 |             |                         |                      |                      |                      |                  |             |                   |
| No                           | 21 (6.52)   | 0.22 (0.02-2.28)        | 1.28 (0.31-5.34)     | 0.69 (0.13-3.53)     | 0.99 (0.22-4.50)     | 1.00             | 0.420       | 0.517             |
| Yes                          | 323 (9.22)  | 1.71 (1.16-2.53)        | 1.53 (1.03-2.27)     | 1.25 (0.85-1.85)     | 1.13 (0.76-1.68)     | 1.00             | 0.003       |                   |
| NIHSS score on admission     |             |                         |                      |                      |                      |                  |             |                   |
| 0-4                          | 147 (8.03)  | 2.19 (1.18-4.05)        | 1.85 (0.99-3.46)     | 1.64 (0.90-3.01)     | 1.74 (0.96-3.15)     | 1.00             | 0.017       | 0.325             |
| ≥4                           | 197 (9.88)  | 1.31 (0.80-2.13)        | 1.35 (0.83-2.19)     | 1.01 (0.62-1.66)     | 0.83 (0.50-1.39)     | 1.00             | 0.118       |                   |
| Ischemic stroke subtype      |             |                         |                      |                      |                      |                  |             |                   |
| Large-artery atherosclerosis | 117 (11.05) | 1.27 (0.63-2.55)        | 1.58 (0.81-3.07)     | 1.35 (0.70-2.63)     | 1.19 (0.60-2.37)     | 1.00             | 0.346       | 0.682             |
| Cardiac                      | 23 (10.85)  | 0.54 (0.12-2.53)        | 0.61 (0.10-3.60)     | 0.37 (0.07-1.82)     | 0.33 (0.07-1.50)     | 1.00             | 0.368       |                   |

|                                   |            |                  |                  |                  |                  |      |       |
|-----------------------------------|------------|------------------|------------------|------------------|------------------|------|-------|
| <b>embolism</b>                   |            |                  |                  |                  |                  |      |       |
| <b>Small-vessel<br/>occlusion</b> | 51 (5.91)  | 2.01 (0.69-5.84) | 3.27 (1.20-8.88) | 1.51 (0.52-4.35) | 1.21 (0.40-3.68) | 1.00 | 0.052 |
| <b>Other</b>                      | 153 (9.05) | 2.03 (1.17-3.54) | 1.34 (0.73-2.45) | 1.27 (0.71-2.26) | 1.25 (0.71-2.19) | 1.00 | 0.018 |

HDL-C, high-density lipoprotein cholesterol; NIHSS, National Institutes of Health Stroke Scale.

Supplementary Table S5.2 Subgroup Analysis for the Association between HDL-C and MACEs at 6 Months

| Subgroup                     | Events (%)  | HDL-C quintiles, mmol/L |                      |                      |                      |                  | P for trend | P for interaction |
|------------------------------|-------------|-------------------------|----------------------|----------------------|----------------------|------------------|-------------|-------------------|
|                              |             | Q1, <0.71 mmol/L        | Q2, 0.71-0.83 mmol/L | Q3, 0.83-0.95 mmol/L | Q4, 0.95-1.11 mmol/L | Q5, ≥1.11 mmol/L |             |                   |
| Age                          |             |                         |                      |                      |                      |                  |             |                   |
| <65 years                    | 177 (8.19)  | 1.37 (0.78-2.38)        | 1.38 (0.81-2.35)     | 1.11 (0.65-1.89)     | 0.97 (0.56-1.69)     | 1.00             | 0.138       | 0.910             |
| ≥65 years                    | 186 (11.19) | 1.94 (1.17-3.21)        | 1.74 (1.03-2.95)     | 1.45 (0.88-2.40)     | 1.19 (0.71-1.98)     | 1.00             | 0.005       |                   |
| Sex                          |             |                         |                      |                      |                      |                  |             |                   |
| Men                          | 231 (9.18)  | 1.57 (0.96-2.57)        | 1.53 (0.94-2.49)     | 1.14 (0.69-1.88)     | 0.95 (0.56-1.61)     | 1.00             | 0.014       | 0.851             |
| Women                        | 132 (10.10) | 1.55 (0.85-2.83)        | 1.46 (0.79-2.69)     | 1.56 (0.91-2.67)     | 1.25 (0.73-2.13)     | 1.00             | 0.094       |                   |
| Smoking                      |             |                         |                      |                      |                      |                  |             |                   |
| No                           | 263 (9.81)  | 1.66 (1.08-2.54)        | 1.72 (1.13-2.62)     | 1.20 (0.79-1.84)     | 1.09 (0.71-1.67)     | 1.00             | 0.005       | 0.505             |
| Yes                          | 100 (8.75)  | 1.55 (0.72-3.31)        | 1.15 (0.53-2.54)     | 1.46 (0.70-3.06)     | 1.08 (0.49-2.37)     | 1.00             | 0.253       |                   |
| Drinking                     |             |                         |                      |                      |                      |                  |             |                   |
| No                           | 306 (9.25)  | 1.49 (0.99-2.22)        | 1.48 (0.99-2.21)     | 1.19 (0.80-1.77)     | 1.07 (0.72-1.59)     | 1.00             | 0.021       | 0.952             |
| Yes                          | 57 (11.03)  | 2.68 (0.93-7.72)        | 2.27 (0.76-6.77)     | 2.15 (0.75-6.20)     | 1.24 (0.38-4.02)     | 1.00             | 0.036       |                   |
| Hypertension                 |             |                         |                      |                      |                      |                  |             |                   |
| No                           | 22 (6.83)   | 0.44 (0.07-2.88)        | 1.27 (0.31-5.18)     | 0.63 (0.13-3.19)     | 0.93 (0.20-4.23)     | 1.00             | 0.611       | 0.686             |
| Yes                          | 341 (9.74)  | 1.72 (1.17-2.51)        | 1.57 (1.07-2.31)     | 1.33 (0.91-1.94)     | 1.12 (0.76-1.65)     | 1.00             | 0.002       |                   |
| NIHSS score on admission     |             |                         |                      |                      |                      |                  |             |                   |
| 0-4                          | 152 (8.30)  | 1.97 (1.09-3.56)        | 1.67 (0.91-3.05)     | 1.44 (0.80-2.60)     | 1.54 (0.87-2.74)     | 1.00             | 0.032       | 0.491             |
| ≥4                           | 211 (10.59) | 1.45 (0.90-2.34)        | 1.48 (0.92-2.38)     | 1.22 (0.76-1.95)     | 0.86 (0.52-1.43)     | 1.00             | 0.035       |                   |
| Ischemic stroke subtype      |             |                         |                      |                      |                      |                  |             |                   |
| Large-artery atherosclerosis | 125 (11.80) | 1.23 (0.62-2.44)        | 1.62 (0.85-3.09)     | 1.49 (0.79-2.82)     | 1.26 (0.65-2.43)     | 1.00             | 0.376       | 0.460             |
| Cardiac                      | 23 (10.85)  | 0.54 (0.12-2.53)        | 0.61 (0.10-3.60)     | 0.37 (0.07-1.82)     | 0.33 (0.07-1.50)     | 1.00             | 0.368       |                   |

|                               |            |                  |                  |                  |                  |      |       |
|-------------------------------|------------|------------------|------------------|------------------|------------------|------|-------|
| <b>embolism</b>               |            |                  |                  |                  |                  |      |       |
| <b>Small-vessel occlusion</b> | 54 (6.26)  | 1.97 (0.68-5.73) | 3.66 (1.37-9.76) | 1.66 (0.59-4.68) | 1.21 (0.40-3.67) | 1.00 | 0.040 |
| <b>Other</b>                  | 161 (9.53) | 2.17 (1.27-3.70) | 1.33 (0.74-2.42) | 1.31 (0.75-2.29) | 1.18 (0.67-2.05) | 1.00 | 0.006 |

HDL-C, high-density lipoprotein cholesterol; MACEs, major adverse cardiovascular events; NIHSS, National Institutes of Health Stroke Scale.

Supplementary Table S5.3 Subgroup Analysis for the Association between HDL-C and Recurrent Stroke at 12 Months

| Subgroup                     | Events (%)  | HDL-C quintiles, mmol/L |                      |                      |                      |                  | P for trend | P for interaction |
|------------------------------|-------------|-------------------------|----------------------|----------------------|----------------------|------------------|-------------|-------------------|
|                              |             | Q1, <0.71 mmol/L        | Q2, 0.71-0.83 mmol/L | Q3, 0.83-0.95 mmol/L | Q4, 0.95-1.11 mmol/L | Q5, ≥1.11 mmol/L |             |                   |
| Age                          |             |                         |                      |                      |                      |                  |             |                   |
| <65 years                    | 206 (9.53)  | 1.50 (0.89-2.53)        | 1.50 (0.91-2.48)     | 1.25 (0.76-2.07)     | 1.18 (0.71-1.95)     | 1.00             | 0.077       | 0.948             |
| ≥65 years                    | 212 (12.76) | 1.72 (1.08-2.75)        | 1.64 (1.01-2.65)     | 1.37 (0.87-2.18)     | 1.05 (0.65-1.69)     | 1.00             | 0.008       |                   |
| Sex                          |             |                         |                      |                      |                      |                  |             |                   |
| Men                          | 267 (10.61) | 1.58 (1.01-2.49)        | 1.56 (1.00-2.45)     | 1.13 (0.71-1.81)     | 1.10 (0.68-1.76)     | 1.00             | 0.014       | 0.618             |
| Women                        | 151 (11.55) | 1.56 (0.89-2.74)        | 1.44 (0.81-2.57)     | 1.69 (1.03-2.77)     | 1.08 (0.64-1.82)     | 1.00             | 0.052       |                   |
| Smoking                      |             |                         |                      |                      |                      |                  |             |                   |
| No                           | 307 (11.45) | 1.55 (1.04-2.30)        | 1.55 (1.05-2.29)     | 1.30 (0.89-1.89)     | 1.06 (0.71-1.56)     | 1.00             | 0.008       | 0.970             |
| Yes                          | 111 (9.71)  | 1.99 (0.93-4.25)        | 1.77 (0.83-3.78)     | 1.59 (0.74-3.42)     | 1.47 (0.68-3.20)     | 1.00             | 0.069       |                   |
| Drinking                     |             |                         |                      |                      |                      |                  |             |                   |
| No                           | 354 (10.70) | 1.52 (1.05-2.22)        | 1.48 (1.02-2.15)     | 1.26 (0.87-1.82)     | 1.13 (0.79-1.64)     | 1.00             | 0.012       | 0.899             |
| Yes                          | 64 (12.38)  | 2.30 (0.86-6.12)        | 2.39 (0.91-6.26)     | 2.04 (0.79-5.24)     | 0.99 (0.33-3.01)     | 1.00             | 0.032       |                   |
| Hypertension                 |             |                         |                      |                      |                      |                  |             |                   |
| No                           | 25 (7.76)   | 0.18 (0.02-1.91)        | 1.75 (0.47-6.57)     | 0.56 (0.11-2.85)     | 1.18 (0.29-4.90)     | 1.00             | 0.464       | 0.232             |
| Yes                          | 393 (11.22) | 1.73 (1.21-2.46)        | 1.54 (1.08-2.20)     | 1.38 (0.98-1.96)     | 1.13 (0.79-1.62)     | 1.00             | <0.001      |                   |
| NIHSS score on admission     |             |                         |                      |                      |                      |                  |             |                   |
| 0-4                          | 181 (9.89)  | 1.98 (1.14-3.41)        | 1.88 (1.09-3.24)     | 1.71 (1.01-2.89)     | 1.43 (0.83-2.44)     | 1.00             | 0.008       | 0.561             |
| ≥4                           | 237 (11.89) | 1.39 (0.89-2.19)        | 1.39 (0.89-2.18)     | 1.13 (0.72-1.77)     | 0.98 (0.62-1.56)     | 1.00             | 0.070       |                   |
| Ischemic stroke subtype      |             |                         |                      |                      |                      |                  |             |                   |
| Large-artery atherosclerosis | 140 (13.22) | 1.37 (0.73-2.59)        | 1.78 (0.97-3.24)     | 1.51 (0.83-2.76)     | 1.25 (0.67-2.33)     | 1.00             | 0.175       | 0.640             |
| Cardiac                      | 29 (13.68)  | 0.87 (0.23-3.30)        | 0.53 (0.09-3.06)     | 0.79 (0.21-2.89)     | 0.29 (0.07-1.30)     | 1.00             | 0.866       |                   |

|                                   |             |                  |                  |                  |                  |      |       |
|-----------------------------------|-------------|------------------|------------------|------------------|------------------|------|-------|
| <b>embolism</b>                   |             |                  |                  |                  |                  |      |       |
| <b>Small-vessel<br/>occlusion</b> | 69 (8.00)   | 1.08 (0.45-2.63) | 1.95 (0.88-4.30) | 1.07 (0.47-2.45) | 1.06 (0.46-2.44) | 1.00 | 0.433 |
| <b>Other</b>                      | 180 (10.65) | 2.23 (1.33-3.74) | 1.55 (0.89-2.70) | 1.44 (0.85-2.45) | 1.25 (0.74-2.13) | 1.00 | 0.002 |

HDL-C, high-density lipoprotein cholesterol; NIHSS, National Institutes of Health Stroke Scale.

**Supplementary Table S5.4 Subgroup Analysis for the Association between HDL-C and MACEs at 12 Months**

| Subgroup                        | Events (%)  | HDL-C quintiles, mmol/L |                         |                         |                         |                     | P for trend | P for interaction |
|---------------------------------|-------------|-------------------------|-------------------------|-------------------------|-------------------------|---------------------|-------------|-------------------|
|                                 |             | Q1, <0.71<br>mmol/L     | Q2, 0.71-0.83<br>mmol/L | Q3, 0.83-0.95<br>mmol/L | Q4, 0.95-1.11<br>mmol/L | Q5, ≥1.11<br>mmol/L |             |                   |
| <b>Age</b>                      |             |                         |                         |                         |                         |                     |             |                   |
| <65 years                       | 217 (10.04) | 1.32 (0.80-2.19)        | 1.40 (0.87-2.25)        | 1.14 (0.71-1.84)        | 1.01 (0.62-1.66)        | 1.00                | 0.132       | 0.830             |
| ≥65 years                       | 226 (13.60) | 1.79 (1.13-2.83)        | 1.69 (1.05-2.71)        | 1.57 (1.01-2.45)        | 1.12 (0.70-1.79)        | 1.00                | 0.004       |                   |
| <b>Sex</b>                      |             |                         |                         |                         |                         |                     |             |                   |
| Men                             | 288 (11.44) | 1.48 (0.96-2.28)        | 1.48 (0.97-2.26)        | 1.16 (0.75-1.79)        | 0.98 (0.62-1.54)        | 1.00                | 0.017       | 0.687             |
| Women                           | 155 (11.86) | 1.58 (0.90-2.77)        | 1.54 (0.87-2.72)        | 1.74 (1.06-2.84)        | 1.16 (0.69-1.93)        | 1.00                | 0.041       |                   |
| <b>Smoking</b>                  |             |                         |                         |                         |                         |                     |             |                   |
| No                              | 324 (12.09) | 1.52 (1.03-2.24)        | 1.61 (1.10-2.35)        | 1.31 (0.91-1.90)        | 1.06 (0.72-1.55)        | 1.00                | 0.007       | 0.915             |
| Yes                             | 119 (10.41) | 1.71 (0.84-3.47)        | 1.42 (0.69-2.91)        | 1.55 (0.77-3.12)        | 1.19 (0.57-2.49)        | 1.00                | 0.113       |                   |
| <b>Drinking</b>                 |             |                         |                         |                         |                         |                     |             |                   |
| No                              | 378 (11.43) | 1.47 (1.02-2.11)        | 1.47 (1.02-2.10)        | 1.29 (0.91-1.83)        | 1.09 (0.76-1.56)        | 1.00                | 0.013       | 0.888             |
| Yes                             | 65 (12.57)  | 2.22 (0.83-5.90)        | 2.29 (0.88-5.99)        | 2.15 (0.85-5.46)        | 0.98 (0.33-2.96)        | 1.00                | 0.038       |                   |
| <b>Hypertension</b>             |             |                         |                         |                         |                         |                     |             |                   |
| No                              | 26 (8.07)   | 0.37 (0.06-2.37)        | 1.73 (0.47-6.39)        | 0.54 (0.11-2.66)        | 1.13 (0.27-4.66)        | 1.00                | 0.627       | 0.326             |
| Yes                             | 417 (11.91) | 1.63 (1.16-2.30)        | 1.52 (1.07-2.15)        | 1.41 (1.01-1.97)        | 1.09 (0.77-1.54)        | 1.00                | 0.001       |                   |
| <b>NIHSS score on admission</b> |             |                         |                         |                         |                         |                     |             |                   |
| 0-4                             | 188 (10.27) | 1.74 (1.03-2.95)        | 1.67 (0.99-2.82)        | 1.49 (0.90-2.47)        | 1.30 (0.78-2.17)        | 1.00                | 0.024       | 0.809             |
| ≥4                              | 255 (12.79) | 1.44 (0.92-2.23)        | 1.46 (0.94-2.26)        | 1.31 (0.86-2.01)        | 0.97 (0.62-1.52)        | 1.00                | 0.034       |                   |
| <b>Ischemic stroke subtype</b>  |             |                         |                         |                         |                         |                     |             |                   |
| Large-artery                    | 150 (14.16) | 1.33 (0.71-2.48)        | 1.84 (1.02-3.30)        | 1.68 (0.94-2.99)        | 1.29 (0.71-2.37)        | 1.00                | 0.183       | 0.366             |

|                               |             |                  |                  |                  |                  |      |       |
|-------------------------------|-------------|------------------|------------------|------------------|------------------|------|-------|
| <b>atherosclerosis</b>        |             |                  |                  |                  |                  |      |       |
| <b>Cardiac embolism</b>       | 31 (14.62)  | 0.76 (0.20-2.80) | 0.37 (0.06-2.16) | 0.77 (0.22-2.67) | 0.31 (0.08-1.24) | 1.00 | 0.687 |
| <b>Small-vessel occlusion</b> | 72 (8.34)   | 1.07 (0.44-2.59) | 2.15 (0.99-4.68) | 1.15 (0.51-2.59) | 1.05 (0.46-2.43) | 1.00 | 0.365 |
| <b>Other</b>                  | 190 (11.24) | 2.10 (1.29-3.44) | 1.39 (0.81-2.37) | 1.34 (0.80-2.23) | 1.09 (0.65-1.82) | 1.00 | 0.002 |

HDL-C, high-density lipoprotein cholesterol; MACEs, major adverse cardiovascular events; NIHSS, National Institutes of Health Stroke Scale.



### Supplementary Figure

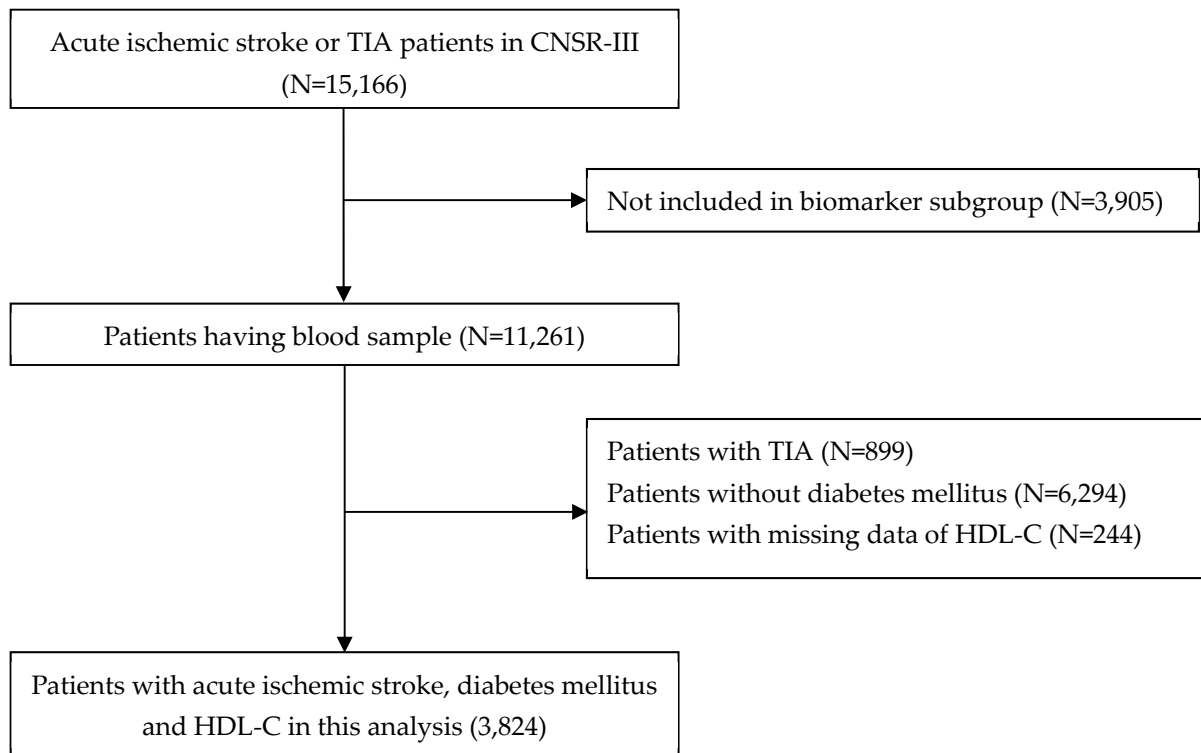

**Figure S1 Flow Chart of the Study Population**

TIA, transient ischemic attack; CNSR-III, Third China National Stroke Registry; HDL-C, high-density lipoprotein cholesterol
